# Supplementary material for: A core–shell CdTe quantum dots molecularly imprinted polymer for recognizing and detecting p-nitrophenol based on computer simulation
Source: Royal Society of Chemistry journal article supplement (doi:10.1039/c5ra06889d), 2015-01-01
Supplement: c5ra06889d1.pdf [file c5ra06889d1.pdf]

## Supporting Information

A core-shell CdTe quantum dots molecularly imprinted polymer for recognizing and detecting p-nitrophenol  
based on computer simulation

Yingchun Wang,<sup>a</sup> Ningwei Wang<sup>d</sup>, Xiaoni Ni,<sup>b</sup> Qianqian Jiang,<sup>a</sup> Wenming Yang,<sup>c</sup>

Weihong Huang<sup>\*a</sup> and Wanzhen Xu<sup>\*a</sup>

<sup>a</sup>School of Environment and Safety Engineering, Jiangsu University, Zhenjiang 212013, China.

<sup>b</sup>Zhenjiang Institute for Drug Control of Jiangsu Province, Zhenjiang 212003, China.

<sup>c</sup>School of Material Science and Engineering, Jiangsu University, Zhenjiang 212013, China.

<sup>d</sup>Zhenjiang Entry-Exit Inspection Quarantine Bureau, Zhenjiang 212003, PR China.

### Corresponding Author

Tel.: +86 511 88791919; fax: +86 511 88791947.

E-mail : whuang689@ujs.edu.cn      xwz09@ujs.edu.cn

Postal address: 301, Xuefu Road, Zhenjiang, Jiangsu Province, China

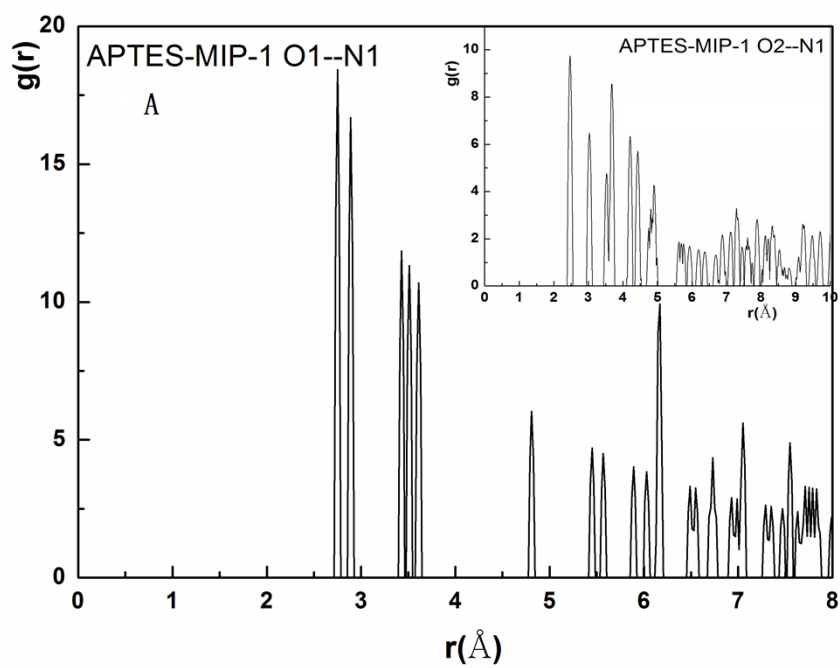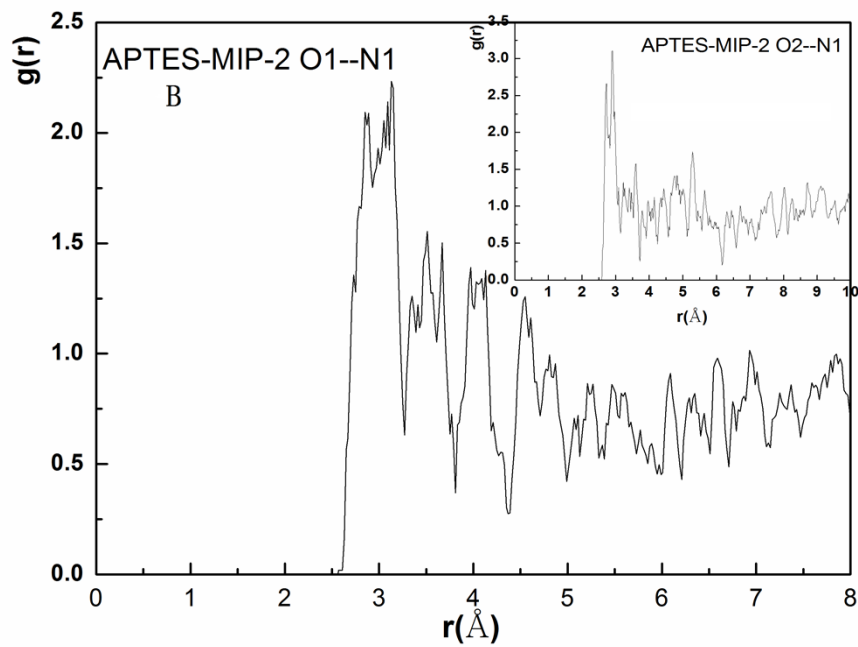

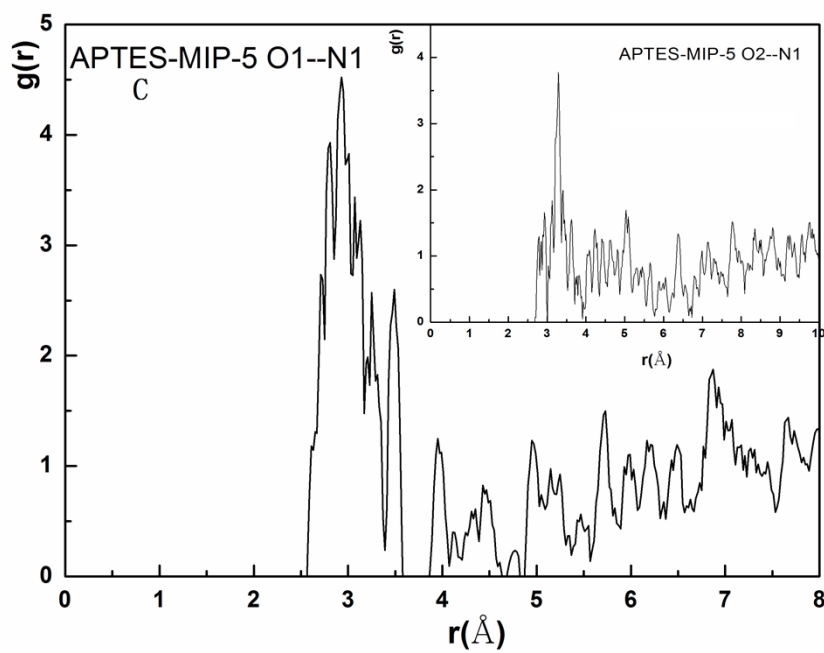

Fig. S1. RDFs showing probabilities of finding atomic densities of APTES at different separation distances from the 4-NP functional groups in the prepolymerization mixtures when the ratios between 4-NP, APTES and TEOS change.
